# Supplementary material
Source: PubMed Central journal article supplement (PMC3328660)
Supplement: NIHMS361721-supplement-01.pdf [file NIHMS361721-supplement-01.pdf]

**Supplementary Table 1: Response methodology for landmark analyses**

| System                                                                   | Classification      | Radiologic Interpretation (6 or 12 months)                | Imaging Finding (6 or 12 months)                                                                                                                                                                                                                         |
|--------------------------------------------------------------------------|---------------------|-----------------------------------------------------------|----------------------------------------------------------------------------------------------------------------------------------------------------------------------------------------------------------------------------------------------------------|
| <b>World Health Organization Guidelines (WHO)</b>                        | <b>RESPONDER</b>    | <b>Complete Response (CR)</b>                             | 100% decrease in cross-product of index lesion                                                                                                                                                                                                           |
|                                                                          |                     | <b>Partial Response (PR)</b>                              | ≥50% decrease in cross-product of index lesion                                                                                                                                                                                                           |
|                                                                          | <b>NONRESPONDER</b> | <b>Stable Disease (SD)</b>                                | <50% decrease to ≤25% increase in cross-product of index lesion                                                                                                                                                                                          |
|                                                                          |                     | <b>Progressive Disease (PD)</b>                           | >25% increase from maximum response of index lesion, new lesions or metastases, development of vascular invasion                                                                                                                                         |
| <b>European Association for the Study of the Liver Guidelines (EASL)</b> | <b>RESPONDER</b>    | <b>Complete Response (CR)</b>                             | 100% decrease in amount of enhancing tissue in index lesion                                                                                                                                                                                              |
|                                                                          |                     | <b>Partial Response (PR)</b>                              | ≥50% decrease in amount of enhancing tissue in index lesion                                                                                                                                                                                              |
|                                                                          | <b>NONRESPONDER</b> | <b>Stable Disease (SD)</b>                                | <50% decrease in to ≤25% increase in amount of enhancing tissue in index lesion                                                                                                                                                                          |
|                                                                          |                     | <b>Progressive Disease (PD)</b>                           | >25% increase in amount of enhancing tissue in index lesion, new lesions or metastases, development/progression of vascular invasion<br><br>AND/OR<br><br>Any new enhancement in previously treated index lesion warranting further locoregional therapy |
| <b>Alpha-fetoprotein (AFP) response</b>                                  | <b>Responder</b>    | >50% decrease in the level of AFP from baseline           |                                                                                                                                                                                                                                                          |
|                                                                          | <b>Nonresponder</b> | <50% decrease from baseline or any increase from baseline |                                                                                                                                                                                                                                                          |
| <b>AFP response (quantitative)*</b>                                      | <b>Responder</b>    | AFP level decrease to <500 ng/mL                          |                                                                                                                                                                                                                                                          |
|                                                                          | <b>Nonresponder</b> | AFP levels did not decrease to <500 ng/mL                 |                                                                                                                                                                                                                                                          |

\* only in patients with AFP >500 ng/mL at baseline

**Supplementary Table 2: Percentage AFP reduction stratified by baseline AFP**

|                    |                                  | Baseline AFP level (ng/mL) |                     |                 |         |
|--------------------|----------------------------------|----------------------------|---------------------|-----------------|---------|
| 3-months<br>(n=43) |                                  | 200-1000<br>(n=17)         | 1000-3000<br>(n=14) | >3000<br>(n=12) | Total   |
|                    | any increase -<br><50% reduction | 6 (35)                     | 4 (29)              | 3 (25)          | 13 (30) |
|                    | 50-75% reduction                 | 1 (6)                      | 1 (7)               | 1 (8)           | 3 (7)   |
|                    | >75-90% reduction                | 4 (24)                     | 1 (7)               | 2 (17)          | 7 (16)  |
|                    | >90% reduction                   | 6 (35)                     | 8 (57)              | 6 (50)          | 20 (47) |
| 6-months<br>(n=23) |                                  | 200-1000<br>(n=8)          | 1000-3000<br>(n=7)  | >3000<br>(n=8)  | Total   |
|                    | any increase -<br><50% reduction | 1 (12)                     | 1 (14)              | 2 (25)          | 4 (17)  |
|                    | 50-75% reduction                 | 1 (12)                     | 0 (0)               | 1 (12)          | 2 (9)   |
|                    | >75-90% reduction                | 0 (0)                      | 0 (0)               | 0 (0)           | 0 (0)   |
|                    | >90% reduction                   | 6 (76)                     | 6 (86)              | 5 (63)          | 17 (74) |

Abbreviation: AFP: Alpha-fetoprotein

1  
2  
3  
4 **Supplementary Table 3: Median AFP at baseline and**  
5 **Landmarks**  
6  
7  
8  
9

|                         |                | <b>Median (ng/ml) (range)</b> |
|-------------------------|----------------|-------------------------------|
| <b>Baseline</b>         |                | 1360 (210 – 270000)           |
| <b>3-month landmark</b> | All patients   | 145 (4.5 – 478900)            |
|                         | Responders     | 51 (4.5 – 24610)              |
|                         | Non-Responders | 2087 (90.7 – 478900)          |
| <b>6-month landmark</b> | All patients   | 52 (3 – 18630)                |
|                         | Responders     | 39 (3 - 4208)                 |
|                         | Non-Responders | 9243 (1362 - 18630)           |

10  
11  
12  
13  
14  
15  
16  
17  
18  
19  
20 Abbreviation: AFP: Alpha-fetoprotein  
21  
22  
23  
24  
25  
26  
27  
28  
29  
30  
31  
32  
33  
34  
35  
36  
37  
38  
39  
40  
41  
42  
43  
44  
45  
46  
47  
48  
49  
50  
51  
52  
53  
54  
55  
56  
57  
58  
59  
60  
61  
62  
63  
64  
65

**Supplementary Table 4: Exploratory survival analysis at 3-month Landmark by AFP response**

| <b>Quantitative AFP response in patients with baseline AFP&gt;500 ng/mL</b> |                                     |                                      |
|-----------------------------------------------------------------------------|-------------------------------------|--------------------------------------|
|                                                                             | <b>R (AFP&lt;500 ng/mL)</b>         | <b>NR (AFP &gt;500 ng/mL)</b>        |
| <b>N</b>                                                                    | 22                                  | 13                                   |
| <b>Median Survival (months)</b>                                             | 29.4 months                         | 6.8 months                           |
| <b>P value</b>                                                              | <b>0.003</b>                        |                                      |
| <b>Excluding patients with PVT</b>                                          |                                     |                                      |
|                                                                             | <b>R (&gt;50% reduction in AFP)</b> | <b>NR (&lt;50% reduction in AFP)</b> |
| <b>N</b>                                                                    | 26                                  | 10                                   |
| <b>Median Survival (months)</b>                                             | 27.6                                | 4.0                                  |
| <b>P value</b>                                                              | <b>0.0003</b>                       |                                      |

Abbreviations: AFP: Alpha-fetoprotein; R: responders; NR: nonresponders; PVT: Portal vein thrombosis

**Supplementary Table 5: Distribution of tumor size and Albumin/Bilirubin among responders and nonresponders**

| Landmark | Variable      | Size    | WHO |    |         | EASL |    |         | AFP |    |         |
|----------|---------------|---------|-----|----|---------|------|----|---------|-----|----|---------|
|          |               |         | R   | NR | P value | R    | NR | P value | R   | NR | P value |
| 3 months | Baseline Size | ≤5 cm   | 7   | 18 | 0.901   | 18   | 7  | 0.373   | 18  | 7  | 0.866   |
|          |               | 5-10 cm | 4   | 9  |         | 9    | 4  |         | 9   | 4  |         |
|          |               | >10 cm  | 1   | 4  |         | 2    | 3  |         | 3   | 2  |         |
|          | Albumin       | ≥3.5    | 3   | 5  | 0.815   | 8    | 0  | 0.078   | 8   | 0  | 0.101   |
|          |               | <3.5    | 9   | 26 |         | 21   | 14 |         | 22  | 13 |         |
|          | Bilirubin     | ≤1.2    | 5   | 18 | 0.531   | 15   | 8  | 0.993   | 15  | 8  | 0.716   |
| >1.2     |               | 7       | 13  | 14 |         | 6    | 15 |         | 5   |    |         |
| 6 months | Baseline Size | ≤5 cm   | 5   | 7  | 0.973   | 10   | 2  | 0.570   | 10  | 2  | 0.420   |
|          |               | 5-10 cm | 4   | 5  |         | 7    | 2  |         | 8   | 1  |         |
|          |               | >10 cm  | 1   | 1  |         | 1    | 1  |         | 1   | 1  |         |
|          | Albumin*      | ≥3.5    | 3   | 3  | 0.964   | 6    | 0  | 0.323   | 5   | 1  | 0.612   |
|          |               | <3.5    | 6   | 10 |         | 11   | 5  |         | 13  | 3  |         |
|          | Bilirubin**   | ≤1.2    | 4   | 4  | 0.675   | 6    | 2  | 0.669   | 6   | 2  | 0.978   |
| >1.2     |               | 4       | 9   | 10 |         | 3    | 11 |         | 2   |    |         |

\*Albumin level was not available at 6 months for 1 patient

\*\*Bilirubin levels were not available at 6 months for 2 patients

Abbreviations: AFP: Alpha-fetoprotein; EASL: European Association for the Study of the Liver; WHO: World Health Organization
